# Supplementary figures and images for: MRI-measured regression of carotid atherosclerosis induced by statins with and without niacin in a randomised controlled trial: the NIA plaque study
Source: HighWire-hosted journal article supplement (doi:10.1136/heartjnl-2013-303926), 2013-07-19

**Supplemental Figure 1: Study flow and reasons for discontinuation**

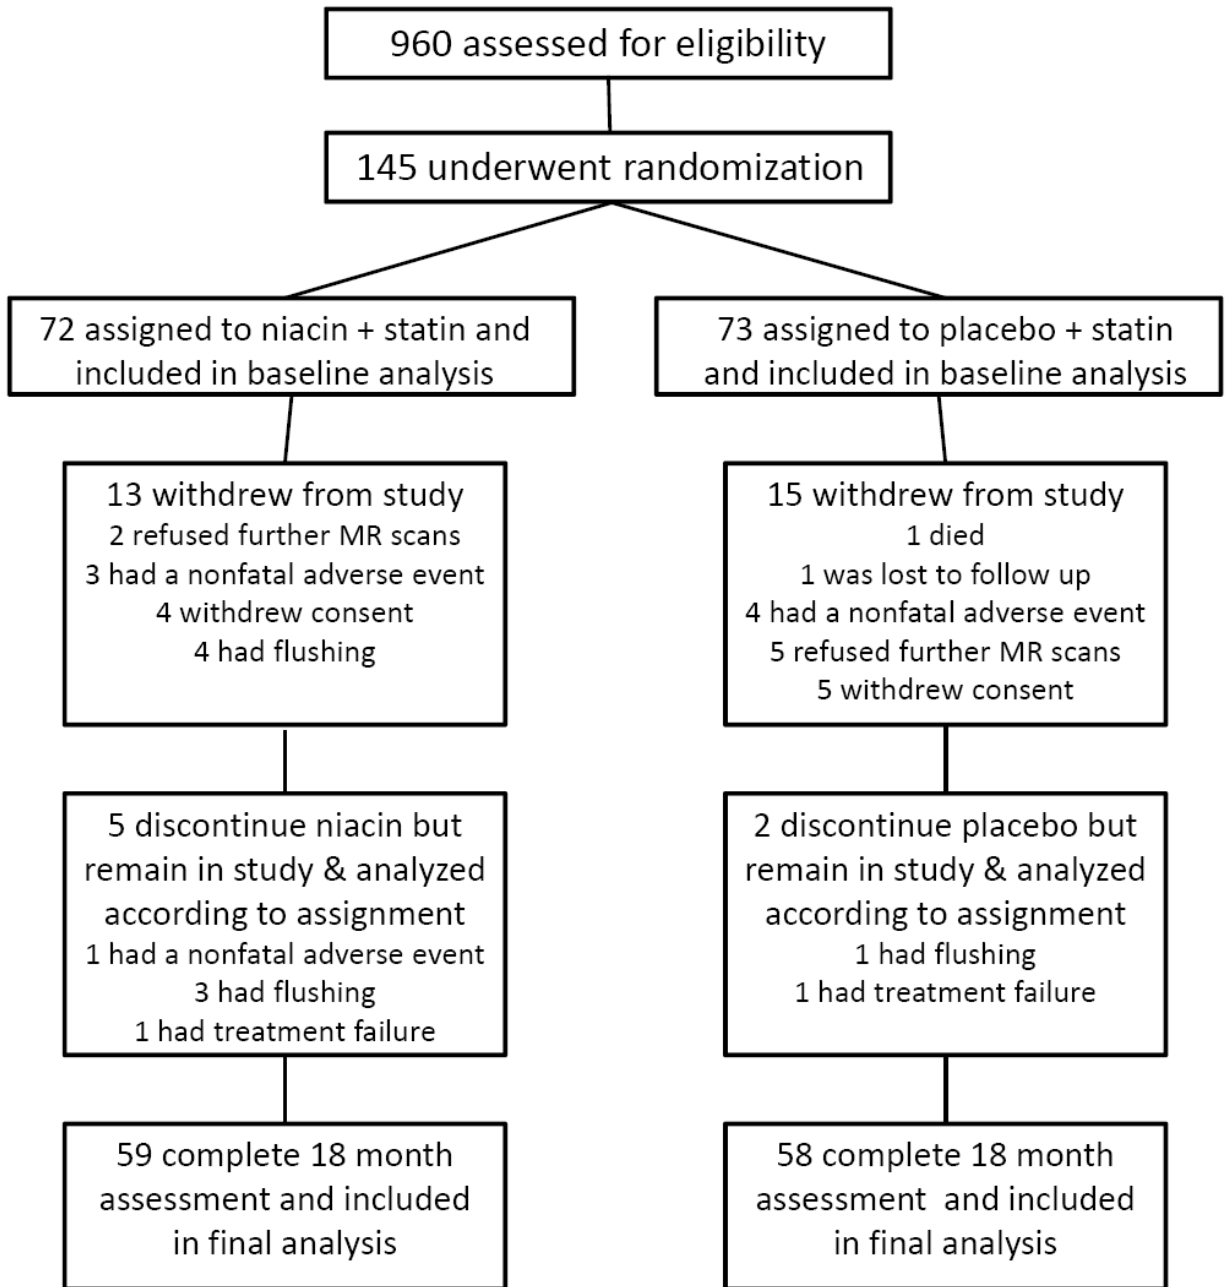

Supplement: heartjnl-2013-303926supp_figure.pdf [file heartjnl-2013-303926supp_figure.pdf]
